# Supplementary material
Source: HighWire-hosted journal article supplement (https://bmjopen.bmj.com/content/9/6/e028292)
Supplement: inline-supplementary-material-1 [file inline-supplementary-material-1.pdf]

**Additional Table 1.** Proportion of older population and proportion of falls in 2010 and 2017 in each district of Beijing.

|                          | Proportion of older population (%) |      | Proportion of falls (%) (95% CI) |                     |
|--------------------------|------------------------------------|------|----------------------------------|---------------------|
|                          | 2010                               | 2017 | 2010                             | 2017                |
| <b>Overall</b>           | 18.7                               | 24.5 | 7.12 (6.95,7.29)                 | 9.45 (9.31,9.58)    |
| Fengtai <sup>u</sup>     | 21.6                               | 29.2 | 7.14 (6.73,7.57)                 | 9.75 (9.33,10.18)   |
| Shijingshan <sup>u</sup> | 20.7                               | 28.9 | 7.54 (6.86,8.27)                 | 9.82 (9.14,10.55)   |
| Dongcheng <sup>u</sup>   | 20.9                               | 27.9 | 7.69 (7.15,8.26)                 | 10.47 (9.92,11.05)  |
| Chaoyang <sup>u</sup>    | 21.4                               | 27.2 | 7.16 (6.81,7.53)                 | 9.37 (9.06,9.68)    |
| Xicheng <sup>u</sup>     | 21.4                               | 26.9 | 6.99 (6.58,7.42)                 | 8.93 (8.52,9.37)    |
| Mentougou <sup>s</sup>   | 19.1                               | 26.3 | 2.41 (0.60,9.20)                 | 9.28 (8.38,10.27)   |
| Tongzhou <sup>s</sup>    | 17.7                               | 23.4 | 2.27 (1.29,3.96)                 | 8.80 (8.23,9.41)    |
| Pinggu <sup>s</sup>      | 16.9                               | 22.8 | 7.81 (6.27,9.69)                 | 10.91 (10.05,11.83) |
| Shunyi <sup>s</sup>      | 16.7                               | 22.5 | 5.82 (4.51,7.49)                 | 8.82 (8.22,9.46)    |
| Fangshan <sup>s</sup>    | 16.1                               | 22.3 | 4.99 (4.42,5.64)                 | 7.79 (7.33,8.28)    |
| Huairou <sup>s</sup>     | 16.0                               | 22.3 | 4.69 (2.54,8.52)                 | 9.48 (8.56,10.48)   |
| Yanqing <sup>s</sup>     | 16.3                               | 22.2 | 4.94 (3.94,6.17)                 | 9.47 (8.48,10.55)   |
| Miyun <sup>s</sup>       | 15.8                               | 22.1 | 4.81 (3.80,6.08)                 | 8.10 (7.33,8.95)    |
| Changping <sup>s</sup>   | 16.0                               | 21.5 | 7.69 (6.67,8.86)                 | 9.96 (9.37,10.59)   |
| Haidian <sup>u</sup>     | 16.6                               | 21.0 | 8.10 (7.66,8.57)                 | 10.62 (10.23,11.03) |
| Daxing <sup>s</sup>      | 16.0                               | 20.6 | 6.07 (4.37,8.38)                 | 8.54 (8.00,9.11)    |

<sup>u</sup> Urban; <sup>s</sup> Suburban

Percentages with 95% CI were unadjusted and were calculated by normal distribution method.

**Additional Table 2.** Trends in proportion of older population and proportion of falls in urban and suburban regions among different sex groups from 2010 to 2017.

|                | Male      |                                |           |                                |          | Female    |                                |           |                                |          |
|----------------|-----------|--------------------------------|-----------|--------------------------------|----------|-----------|--------------------------------|-----------|--------------------------------|----------|
|                | Urban     |                                | Suburban  |                                | <i>P</i> | Urban     |                                | Suburban  |                                | <i>P</i> |
|                | Number, N | Proportion of falls,% (95% CI) | Number, N | Proportion of falls,% (95% CI) |          | Number, N | Proportion of falls,% (95% CI) | Number, N | Proportion of falls,% (95% CI) |          |
| <b>Overall</b> | 344 806   | 7.30 (7.22,7.39)               | 142 609   | 6.77 (6.65,6.91)               | <0.0001  | 347 915   | 9.92 (9.82,10.02)              | 131 137   | 8.89 (8.74,9.05)               | <0.0001  |
| 2010           | 38 782    | 6.26 (6.02,6.50)               | 7 379     | 5.18 (4.69,5.71)               |          | 36 586    | 8.57 (8.29,8.87)               | 5 918     | 6.18 (5.60,6.83)               |          |
| 2011           | 36 737    | 6.76 (6.51,7.03)               | 9 659     | 5.31 (4.88,5.78)               |          | 37 340    | 8.84 (8.56,9.13)               | 9 321     | 7.41 (6.90,7.96)               |          |
| 2012           | 40 734    | 7.08 (6.84,7.34)               | 9 106     | 5.81 (5.35,6.31)               |          | 41 567    | 9.09 (8.82,9.37)               | 8 408     | 7.79 (7.24,8.38)               |          |
| 2013           | 41 727    | 7.26 (7.01,7.51)               | 11 617    | 5.12 (4.74,5.54)               |          | 42 481    | 10.04 (9.75,10.32)             | 10 461    | 7.31 (6.83,7.83)               |          |
| 2014           | 41 644    | 7.38 (7.13,7.63)               | 16 168    | 6.34 (5.97,6.73)               |          | 43 316    | 9.77 (9.50,10.06)              | 14 878    | 8.02 (7.59,8.47)               |          |
| 2015           | 42 520    | 7.54 (7.29,7.79)               | 23 097    | 7.14 (6.81,7.47)               |          | 43 527    | 10.32 (10.04,10.61)            | 21 802    | 9.32 (8.94,9.71)               |          |
| 2016           | 47 396    | 7.48 (7.25,7.72)               | 30 064    | 7.42 (7.13,7.72)               |          | 47 613    | 10.58 (10.31,10.86)            | 28 176    | 9.41 (9.08,9.76)               |          |
| 2017           | 55 266    |                                | 35 519    |                                |          | 55 485    |                                | 32 173    | 10.29                          |          |
|                |           | 8.21 (7.98,8.44)               |           | 7.71 (7.44,7.99)               |          |           | 11.30 (11.04,11.57)            |           | (9.96,10.62)                   |          |
| $\chi^2$       |           | 138.819                        |           | 183.496                        |          |           | 290.516                        |           | 210.474                        |          |
| <i>P</i>       |           | <0.0001                        |           | <0.0001                        |          |           | <0.0001                        |           | <0.0001                        |          |

Participants with missing sex or district data (20 723) were not included.

Percentages with 95% CI were unadjusted and were calculated by normal distribution method.

**Additional Table 3.** Trends in proportion of older population and proportion of falls in urban and suburban regions among different age groups from 2010 to 2017.

|                | Aged 60 - 79 |                                |           |                                |          | Aged 80 - 100 |                                |           |                                |          |
|----------------|--------------|--------------------------------|-----------|--------------------------------|----------|---------------|--------------------------------|-----------|--------------------------------|----------|
|                | Urban        |                                | Suburban  |                                | <i>P</i> | Urban         |                                | Suburban  |                                | <i>P</i> |
|                | Number, N    | Proportion of falls,% (95% CI) | Number, N | Proportion of falls,% (95% CI) |          | Number, N     | Proportion of falls,% (95% CI) | Number, N | Proportion of falls,% (95% CI) |          |
| <b>Overall</b> | 379 233      | 7.37 (7.29,7.46)               | 177 348   | 6.87 (6.75,6.99)               | <0.0001  | 299 829       | 9.41 (9.31,9.52)               | 89 868    | 9.60 (9.41,9.79)               | 0.100    |
| 2010           | 45 693       | 6.55 (6.33,6.78)               | 7 538     | 5.08 (4.61,5.6)                |          | 28 785        | 8.23 (7.91,8.55)               | 3 152     | 7.27 (6.41,8.23)               |          |
| 2011           | 44 016       | 6.80 (6.57,7.04)               | 12 284    | 5.53 (5.14,5.95)               |          | 29 314        | 8.61 (8.29,8.93)               | 5 138     | 8.14 (7.42,8.92)               |          |
| 2012           | 46 550       | 6.67 (6.45,6.90)               | 12 349    | 6.02 (5.61,6.45)               |          | 33 396        | 8.29 (8.00,8.60)               | 5 509     | 9.04 (8.31,9.83)               |          |
| 2013           | 45 479       | 7.11 (6.88,7.35)               | 15 315    | 5.79 (5.43,6.17)               |          | 35 360        | 9.01 (8.71,9.31)               | 6 902     | 8.20 (7.58,8.87)               |          |
| 2014           | 44 693       | 7.13 (6.90,7.38)               | 19 964    | 5.79 (5.47,6.12)               |          | 36 331        | 9.18 (8.89,9.49)               | 9 422     | 9.02 (8.46,9.62)               |          |
| 2015           | 45 988       | 7.82 (7.58,8.07)               | 29 391    | 7.01 (6.73,7.31)               |          | 39 084        | 9.84 (9.55,10.14)              | 15 399    | 10.07 (9.61,10.56)             |          |
| 2016           | 49 528       | 7.71 (7.48,7.95)               | 37 130    | 7.37 (7.11,7.64)               |          | 44 479        | 10.14 (9.86,10.42)             | 20 375    | 9.95 (9.55,10.37)              |          |
| 2017           | 57 286       | 8.77 (8.54,9.01)               | 43 377    | 8.15 (7.90,8.41)               |          | 53 080        | 10.71 (10.45,10.98)            | 23 971    | 10.36 (9.98,10.75)             |          |
| $\chi^2$       |              | 252.426                        |           | 246.324                        |          |               | 252.364                        |           | 66.404                         |          |
| <i>P</i>       |              | <0.0001                        |           | <0.0001                        |          |               | <0.0001                        |           | <0.0001                        |          |

Participants with unindicated age or missing district data (40 912) were not included.

Percentages with 95% CI were unadjusted and were calculated by normal distribution method.
